# Supplementary material
Source: ML conference proceedings conference paper supplement (https://openaccess.thecvf.com/content/ICCV2023/html/Wei_Adaptive_Reordering_Sampler_ICCV_2023_paper.html)
Supplement: Supplementary file 1 [file Wei_Adaptive_Reordering_Sampler_ICCV_2023_supplemental.pdf]

— **Supplementary Material** —  
**Adaptive Reordering Sampler with Neurally Guided MAGSAC**

Tong Wei<sup>1</sup>, Jiří Matas<sup>1</sup>, Daniel Barath<sup>2</sup>

<sup>1</sup> Visual Recognition Group, FEE, Czech Technical University in Prague

<sup>2</sup> Computer Vision and Geometry Group, ETH Zurich

{weitong, matas}@fel.cvut.cz, danielbela.barath@inf.ethz.ch

**Input Correspondence Structure.** Each input SIFT correspondence is represented by a 7-dimensional vector comprising of various elements. The first four dimensions correspond to the coordinates of the corresponding points in the two images, specifically  $(x_1, y_1)$  and  $(x_2, y_2)$ . An additional dimension is derived from the Second Nearest Neighbor (SNN) ratio, which can be interpreted as an indicator of the matching quality. Furthermore, we incorporate scale ( $q \in \mathbb{R}$ ) and rotation ( $\alpha \in [0, 2\pi]$ ) values that are derived from the image features. Specifically, the scale value,  $q$ , represents the ratio of the feature sizes in the two images and is calculated as  $q = q_2/q_1$ . Here,  $q_i$  denotes the feature size in the  $i$ th image. Similarly, the rotation value,  $\alpha$ , represents the relative rotation from the first to the second image and is calculated as  $\alpha = \alpha_2 - \alpha_1$ , where  $\alpha_i$  denotes the orientation in the  $i$ th image. Hence, these parameters can be combined to form a 7-dimensional vector represented as  $[x_1, y_1, x_2, y_2, \text{SNN}, q, \alpha]$ .
